# Supplementary material for: Screening for Primordial RNA–Peptide Interactions Using High-Density Peptide Arrays
Source: MDPI journal article supplement (doi:10.3390/life13030796), 2023-03-15
Supplement: s1 [file s1]

# Screening for primordial RNA-peptide interactions using high-density peptide arrays

Felix Jenne , Ivan Berezkin , Frank Tempel , Dimitry Schmidt , Roman Popov ,  
and Alexander Nesterov-Mueller

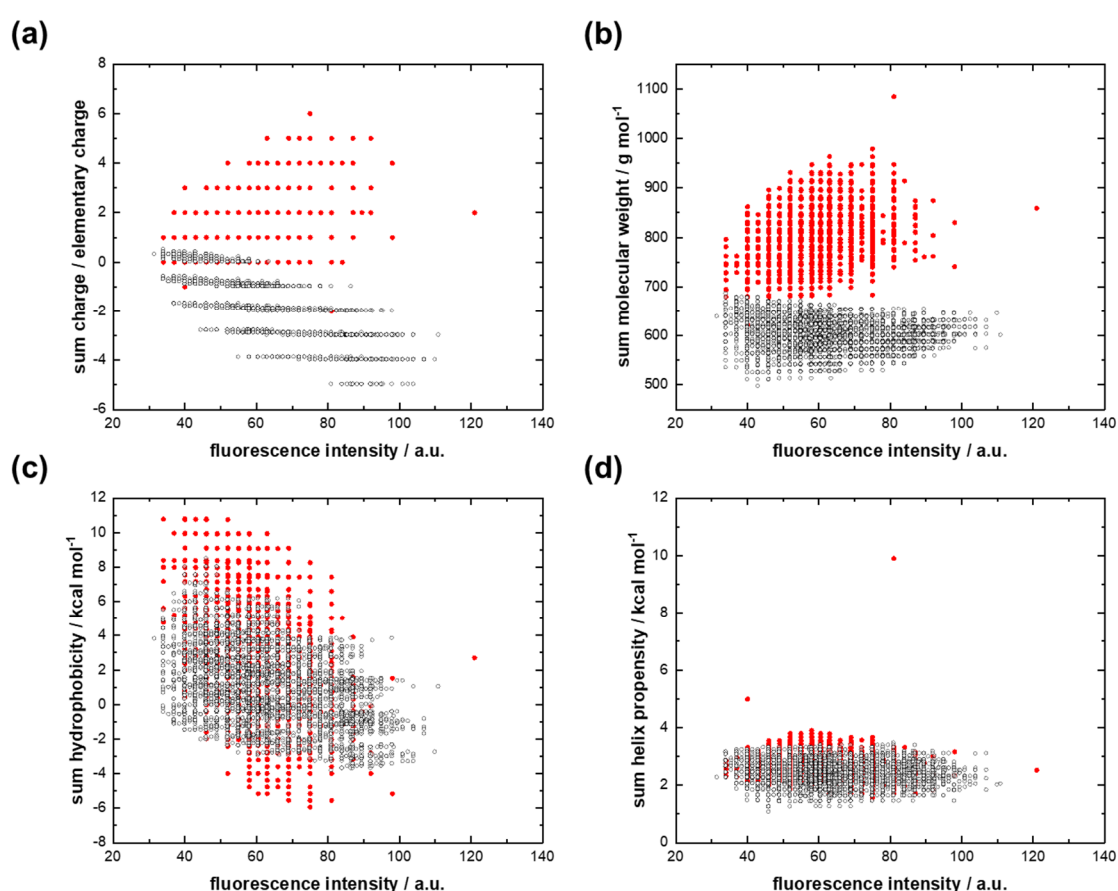

**Figure S1.** Interactions of the dominant AU-protocode (red dots) and the recessive AU-protocode (black dots) with 12-mer uracil RNA. **(a)** Fluorescence intensity versus the sum charge; **(b)** Fluorescence intensity versus the sum molecular weight; **(c)** Fluorescence intensity versus the sum hydrophobicity; **(d)** Fluorescence intensity versus the sum helix propensity.

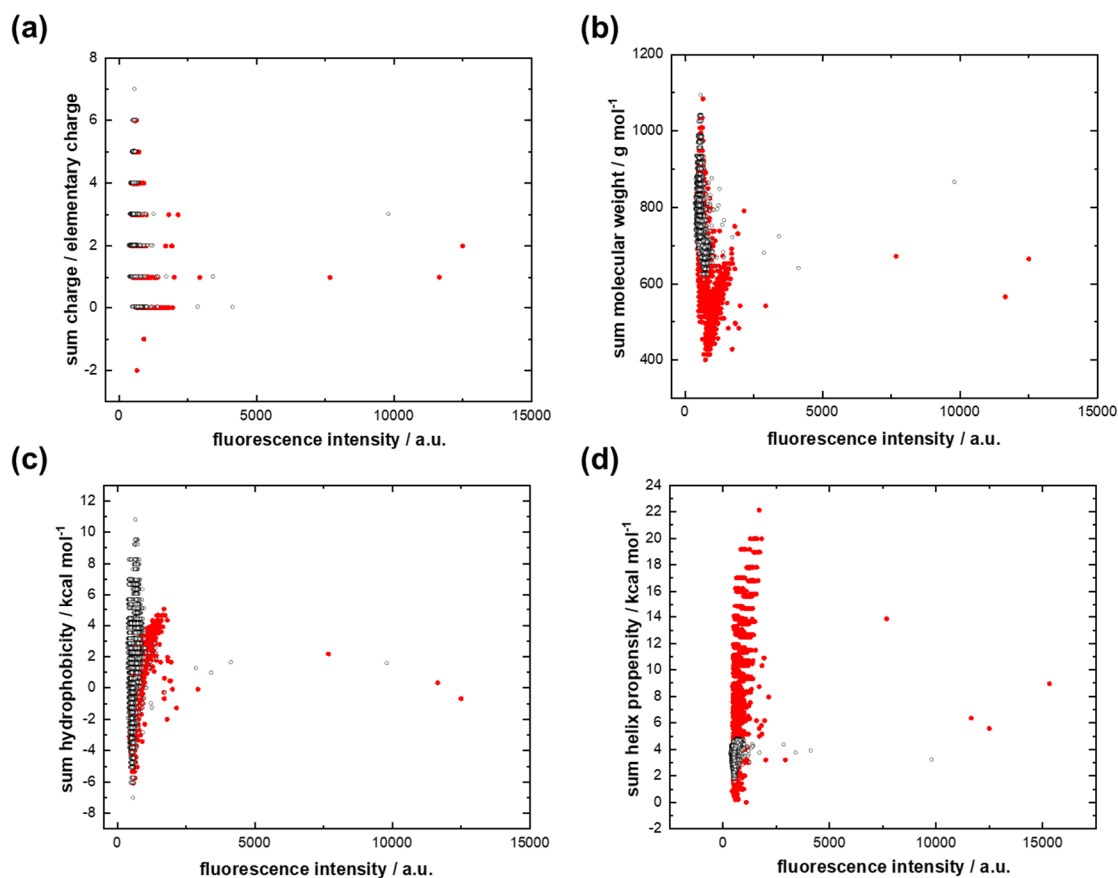

**Figure S2.** Interactions of the dominant GC-protocode (red dots) and the recessive GC-protocode (black dots) with 12-mer guanine RNA. **(a)** Fluorescence intensity versus the sum charge; **(b)** Fluorescence intensity versus the sum molecular weight; **(c)** Fluorescence intensity versus the sum hydrophobicity; **(d)** Fluorescence intensity versus the sum helix propensity.

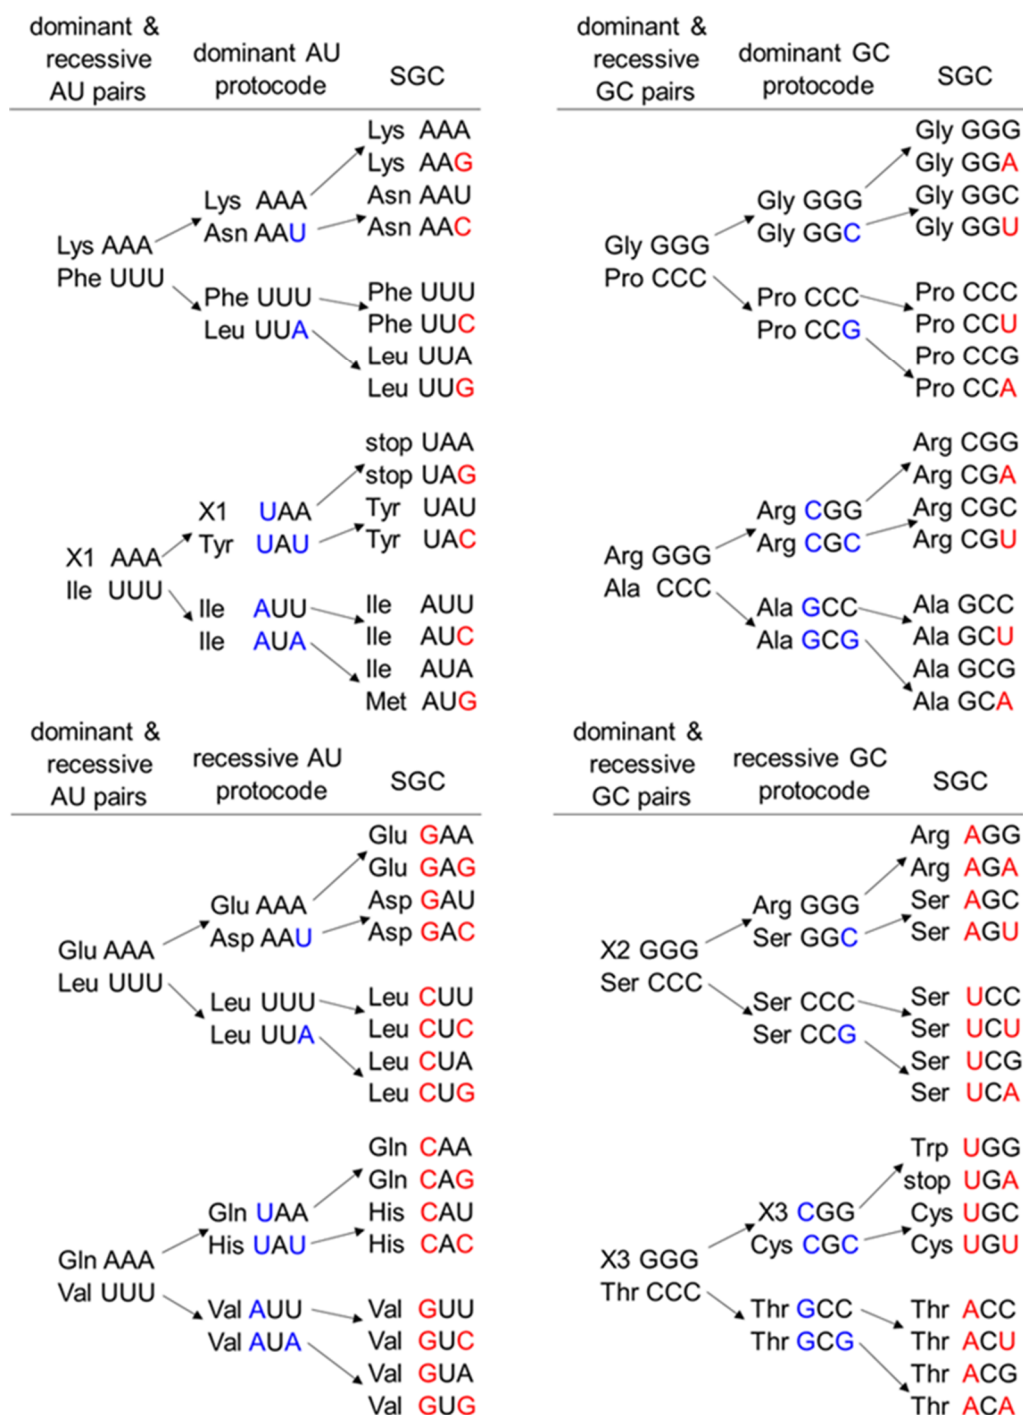

**Figure S3.** The combinatorial fusion cascade leading to the codon assignments in the SGC. The blue letters indicate the fusion rules for the dominant and recessive AAA/UUU- and GGG/CCC-pairs to the protocols. The red letters indicate the fusion rules for dominant and recessive AU- and GC-protocols to the SGC (see section 2.1) [55].
